# Supplementary material for: Core–Shell Fe3O4@C Nanoparticles for the Organic Dye Adsorption and Targeted Magneto-Mechanical Destruction of Ehrlich Ascites Carcinoma Cells
Source: MDPI journal article supplement (doi:10.3390/ma16010023), 2022-12-20
Supplement: s1 [file s1]

# Core–Shell Fe<sub>3</sub>O<sub>4</sub>@C Nanoparticles for the Organic Dye Adsorption and Targeted Magneto-Mechanical Destruction of Ehrlich Ascites Carcinoma Cells

Oxana S. Ivanova <sup>1,2,\*</sup>, Irina S. Edelman <sup>1,2</sup>, Chun-Rong Lin <sup>3,\*</sup>, Evgeniy S. Svetlitsky <sup>1</sup>, Alexey E. Sokolov <sup>1,2</sup>, Kirill A. Lukyanenko <sup>2,4,5</sup>, Alexander L. Sukhachev <sup>1</sup>, Nikolay P. Shestakov <sup>1</sup>, Ying-Zhen Chen <sup>3</sup> and Aleksandr A. Spivakov <sup>3</sup>

<sup>1</sup> Kirensky Institute of Physics, Federal Research Center KSC Siberian Branch, Russian Academy of Sciences, Krasnoyarsk 660036, Russia

<sup>2</sup> Institute of Engineering Physics and Radioelectronics, Siberian Federal University, Krasnoyarsk 660041, Russia

<sup>3</sup> Department of Applied Physics, National Pingtung University, Pingtung City 90003, Taiwan

<sup>4</sup> Laboratory of Biomolecular and Medical Technologies, Krasnoyarsk State Medical University Named after Prof. V.F. Voyno-Yasenetsky, Krasnoyarsk 660022, Russia

<sup>5</sup> Laboratory for Digital Controlled Drugs and Theranostics, Federal Research Center KSC Siberian Branch, Russian Academy of Sciences, Krasnoyarsk 660036, Russia

\* Correspondence: [osi@iph.krasn.ru](mailto:osi@iph.krasn.ru) (O.S.I.); [crlinspin@gmail.com](mailto:crlinspin@gmail.com) (C.-R.L.)

**Table S1.** Kinetic parameters of the intra-particle diffusion model parameters for the adsorption of the dyes ( $C_0 = 60$  mg/L for CR and  $C_0 = 30$  mg/L for other dyes) on Fe<sub>3</sub>O<sub>4</sub> NPs at 25°C.

| Kinetics                      | Parameters                         | EoY   | CR    | MB    | RhC  |
|-------------------------------|------------------------------------|-------|-------|-------|------|
| Intraparticle diffusion model | $k_1$ (mg/(g min <sup>0.5</sup> )) | 1.25  | 2.25  | 0.23  | 1.04 |
|                               | $C_1$ (mg/g)                       | -0.32 | 0.05  | -0.80 | 0.13 |
|                               | $R^2$                              | 0.96  | 0.97  | 0.96  | 0.98 |
|                               | $k_2$ (mg/g min <sup>0.5</sup> )   | -0.04 | 0.23  |       | 0.32 |
|                               | $C_2$ (mg/g)                       | 8.97  | 18.30 |       | 4.45 |
|                               | $R^2$                              | 0.83  | 0.87  |       | 0.96 |

The values of the coefficient  $C_1$  are negative and close to zero, which implies a small interaction thickness and a minimal diffusion process at this stage.
